# Supplementary material
Source: publisher figshare collection journal article supplement (https://future-science-group.figshare.com/ndownloader/files/31734479)
Supplement: Supplementary file 1 [file 31734479]

# Supplementary material

Given the exploratory nature of the study as well as the number of variables already considered during the statistical analysis, and because we had no clear hypotheses regarding the MAIA subscales, we decided to only consider the main scores and not the sub scores of this tool. We however explored potential differences between patients and controls during the review stage, but no significant results were retrieved. In order to facilitate the replication of our study, we present these results below (Supplementary Table 1; Supplementary Figure 1).

**Supplementary Table 1**. Mean (SD) scores for the Multidimensional Assessment of Interoceptive Awareness (MAIA) sub-scales for patients with cLBP and controls. No statistical differences were observed between the groups.

| MAIA sub-scale, mean (sd) | cLBP Patients (n=27) | Controls (n=21) |
| --- | --- | --- |
| Trusting | 2.79 (1.75) | 3.22 (1.05) |
| Emotional Awareness | 3.06 (1.10) | 3.33 (0.94) |
| Attention Regulation | 2.98 (1.02) | 2.80 (0.75) |
| Not-Worrying | 2.39 (0.65) | 2.35 (0.85) |
| Self-regulation | 2.42 (1.30) | 2.97 (1.01) |
| Not-Distracting | 1.72 (0.93) | 1.92 (0.81) |
| Noticing | 3.57 (0.96) | 3.13 (0.94) |
| Body Listening | 2.63 (1.27) | 2.45 (1.05) |

cLBP=chronic low back pain; SD=standard deviation.


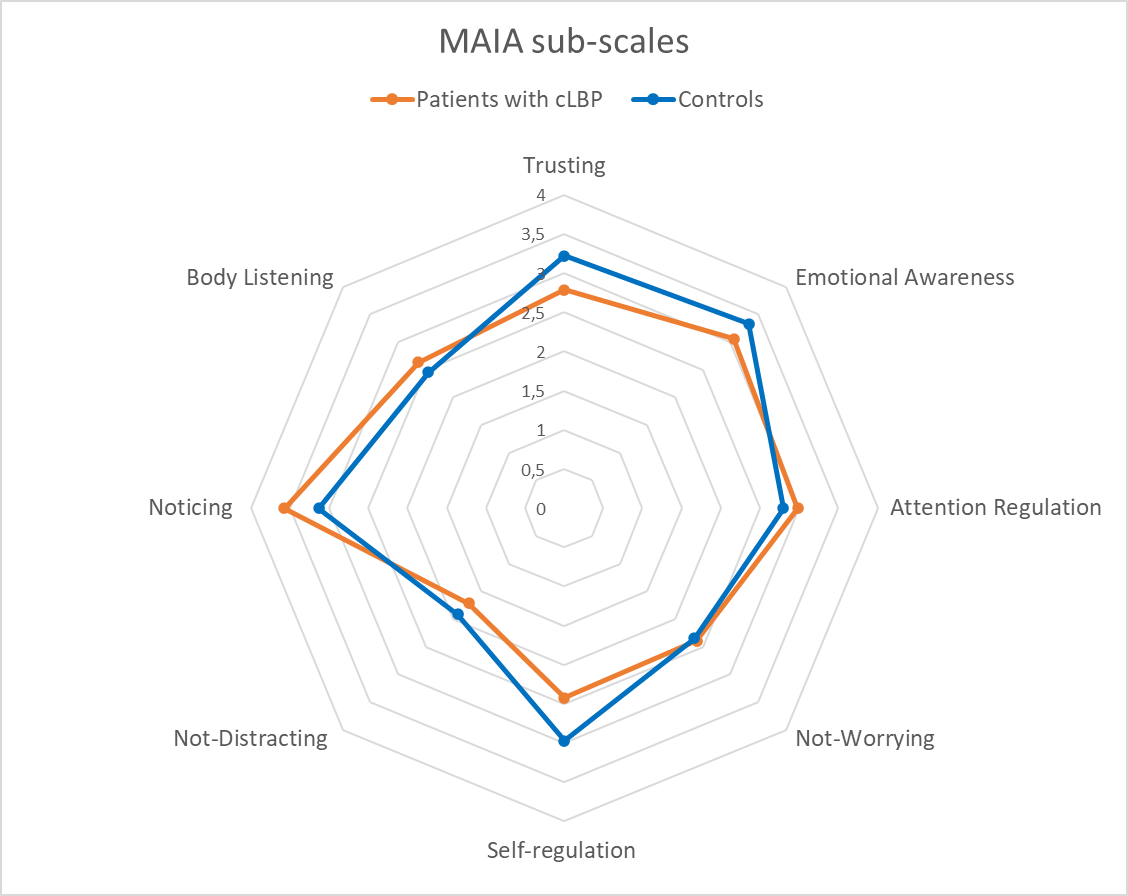


**Supplementary Figure 1**. Performance of Interoceptive sensibility/awareness explored with the Multidimensional Assessment of Interoceptive Awareness (MAIA) in chronic low back pain patients (orange) and controls (blue).
